# Supplementary material
Source: publisher figshare collection journal article supplement (https://karger.figshare.com/ndownloader/files/26519684)
Supplement: Supplementary file 1 [file 26519684]

**Supplement**

*References Cited in Tables 1.*

1. Al-Hwiesh AK, Abdul-Rahman IS, Hussameldeen MA, et al. Colonoscopy in automated peritoneal dialysis patients: value of prophylactic antibiotics: a prospective study on a single antibiotic. *Int J Artif Organs* 2017; **40**(10): 550-7.

2. Bac DJ, van Blankenstein M, de Marie S, Fieren MW. Peritonitis following endoscopic polypectomy in a peritoneal dialysis patient: the need for antibiotic prophylaxis. *Infection* 1994; **22**(3): 220-1.

3. Gayen S, Ziemba Y, Jaiswal S, Frank A, Brahmbhatt Y. CDC Group EO-4 and Candida tropicalis Peritonitis in a Patient on Peritoneal Dialysis after Upper Endoscopy, Colonoscopy and Coil Embolization of the Gastroduodenal Artery. *Case Rep Gastroenterol* 2016; **10**(3): 728-32.

4. Gould AL, Chahla E, Hachem C. Peritonitis following Endoscopy in a Patient on Peritoneal Dialysis with a Discussion of Current Recommendations on Antibiotic Prophylaxis. *Case Rep Gastroenterol* 2015; **9**(3): 302-6.

5. Gweon TG, Jung SH, Kim SW, et al. Risk factors for peritonitis in patients on continuous ambulatory peritoneal dialysis who undergo colonoscopy: a retrospective multicentre study. *BMC Gastroenterol* 2019; **19**(1): 175.

6. Kimura Y, Ito A, Miyamoto K, et al. Morganella morganii Peritonitis Associated with Continuous Ambulatory Peritoneal Dialysis (CAPD) after Colonoscopy. *Intern Med* 2016; **55**(2): 165-8.

7. Lin YC, Lin WP, Huang JY, Lee SY. Polymicrobial peritonitis following colonoscopic polypectomy in a peritoneal dialysis patient. *Intern Med* 2012; **51**(14): 1841-3.

8. Petersen JH, Weesner RE, Giannella RA. Escherichia coli peritonitis after left-sided colonoscopy in a patient on continuous ambulatory peritoneal dialysis. *Am J Gastroenterol* 1987; **82**(2): 171-2.

9. Poortvliet W, Selten HP, Raasveld MH, Klemt-Kropp M. CAPD peritonitis after colonoscopy: follow the guidelines. *Neth J Med* 2010; **68**(9): 377-8.

10. Ray SM, Piraino B, Holley J. Peritonitis following colonoscopy in a peritoneal dialysis patient. *Perit Dial Int* 1990; **10**(1): 97-8.

11. Verger C, Danne O, Vuillemin F. Colonoscopy and continuous ambulatory peritoneal dialysis. *Gastrointest Endosc* 1987; **33**(4): 334-5.

12. Wu HH, Li IJ, Weng CH, et al. Prophylactic antibiotics for endoscopy-associated peritonitis in peritoneal dialysis patients. *PLoS One* 2013; **8**(8): e71532.

13. Yip T, Tse KC, Lam MF, et al. Risks and outcomes of peritonitis after flexible colonoscopy in CAPD patients. *Perit Dial Int* 2007; **27**(5): 560-4.

*References Cited in Tables 2.*

1. Fein PA, Madane SJ, Jorden A, et al. Outcome of percutaneous endoscopic gastrostomy feeding in patients on peritoneal dialysis. *Adv Perit Dial* 2001; **17**: 148-52.

2. Gayen S, Ziemba Y, Jaiswal S, Frank A, Brahmbhatt Y. CDC Group EO-4 and Candida tropicalis Peritonitis in a Patient on Peritoneal Dialysis after Upper Endoscopy, Colonoscopy and Coil Embolization of the Gastroduodenal Artery. *Case Rep Gastroenterol* 2016; **10**(3): 728-32.

3. Gould AL, Chahla E, Hachem C. Peritonitis following Endoscopy in a Patient on Peritoneal Dialysis with a Discussion of Current Recommendations on Antibiotic Prophylaxis. *Case Rep Gastroenterol* 2015; **9**(3): 302-6.

4. Machuca E, Ortiz AM, Rabagliati R. Streptococcus viridans-associated peritonitis after gastroscopy. *Adv Perit Dial* 2005; **21**: 60-2.

5. Morimoto S, Kido E, Higashi M, et al. Peritonitis after gynecological and gastroscopic examinations in a peritoneal dialysis patient. *Clin Nephrol* 2010; **74**(6): 491-2.

6. Nadeau-Fredette AC, Bargman JM. Gastroscopy-related peritonitis in peritoneal dialysis patients. *Perit Dial Int* 2014; **34**(6): 667-70.

7. Wu HH, Li IJ, Weng CH, et al. Prophylactic antibiotics for endoscopy-associated peritonitis in peritoneal dialysis patients. *PLoS One* 2013; **8**(8): e71532.

*References Cited in Tables 3.*

1. Altun E, Kaya B, Taktakoglu O, et al. Comamonas testosteroni peritonitis secondary to dislocated intrauterine device and laparoscopic intervention in a continuous ambulatory peritoneal dialysis patient. *Perit Dial Int* 2013; **33**(5): 576-8.

2. Fan PY, Chan MJ, Lin SH, et al. Prophylactic Antibiotic Reduces the Risk of Peritonitis after Invasive Gynecologic Procedures. *Perit Dial Int* 2019; **39**(4): 356-61.

3. Li PK, Leung CB, Leung AK, Luk WK, Lai KN. Posthysteroscopy fungal peritonitis in a patient on continuous ambulatory peritoneal dialysis. *Am J Kidney Dis* 1993; **21**(4): 446-8.

4. Ma TL, Wang CT, Hwang JC. Recurrent peritonitis episodes in a continuous ambulatory peritoneal dialysis patient after gynecologic procedures. *Perit Dial Int* 2012; **32**(1): 113-4.

5. Maruyama H, Nakamaru T, Oya M, et al. Posthysteroscopy Candida glabrata peritonitis in a patient on CAPD. *Perit Dial Int* 1997; **17**(4): 404-5.

6. Morimoto S, Kido E, Higashi M, et al. Peritonitis after gynecological and gastroscopic examinations in a peritoneal dialysis patient. *Clin Nephrol* 2010; **74**(6): 491-2.

7. Wu HH, Li IJ, Weng CH, et al. Prophylactic antibiotics for endoscopy-associated peritonitis in peritoneal dialysis patients. *PLoS One* 2013; **8**(8): e71532.

8. Yap DY, Tse KC, Lam MF, Chan TM, Lai KN. Polymicrobial CAPD peritonitis after hysteroscopy. *Perit Dial Int* 2009; **29**(2): 237-8.

*.*
